# Supplementary material for: Evaluation of drug-targetable genes by defining modes of abnormality in gene expression
Source: PubMed Central journal article supplement (PMC4559746; doi:10.1038/srep13576), 2015-09-04
Supplement: srep13576-s1.pdf [file srep13576-s1.pdf]

# Evaluation of drug-targetable genes by defining modes of abnormality in gene expression

Junseong Park\*, Jungsul Lee, Chulhee Choi\*

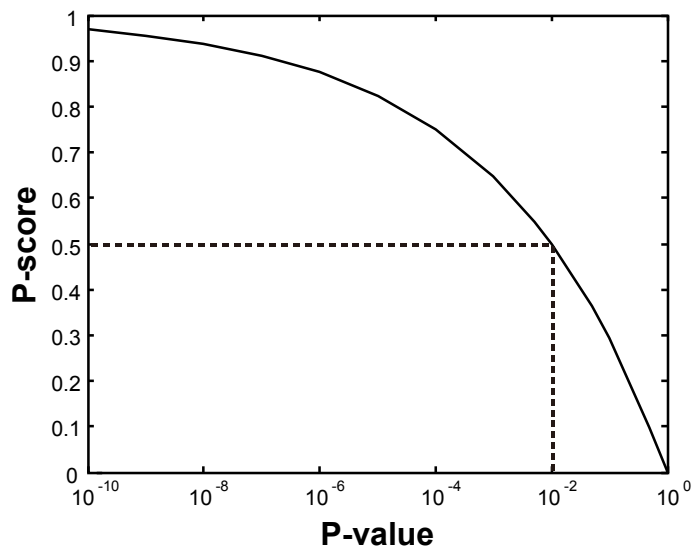

$$P\text{-score} = \text{sign}(tg) \times \{1 - \sqrt{2} \log_{10}(P\text{-value})\}$$
$$\text{sign}(tg) = +1, \text{ if } tg \text{ expression in cancer} \geq \text{in normal}$$
$$-1, \text{ if } tg \text{ expression in cancer} < \text{in normal}$$

## Supplementary Fig. S1. Calculation of P-score according to P-value.

P-score is defined by the represented equation. The graph shows relationship between P-score and P-value; x-axis indicates P-value with log-scale and y-axis indicates P-score. For easy recognition of statistical significance, we projected P-score to 0.5 when P-value is 0.01.

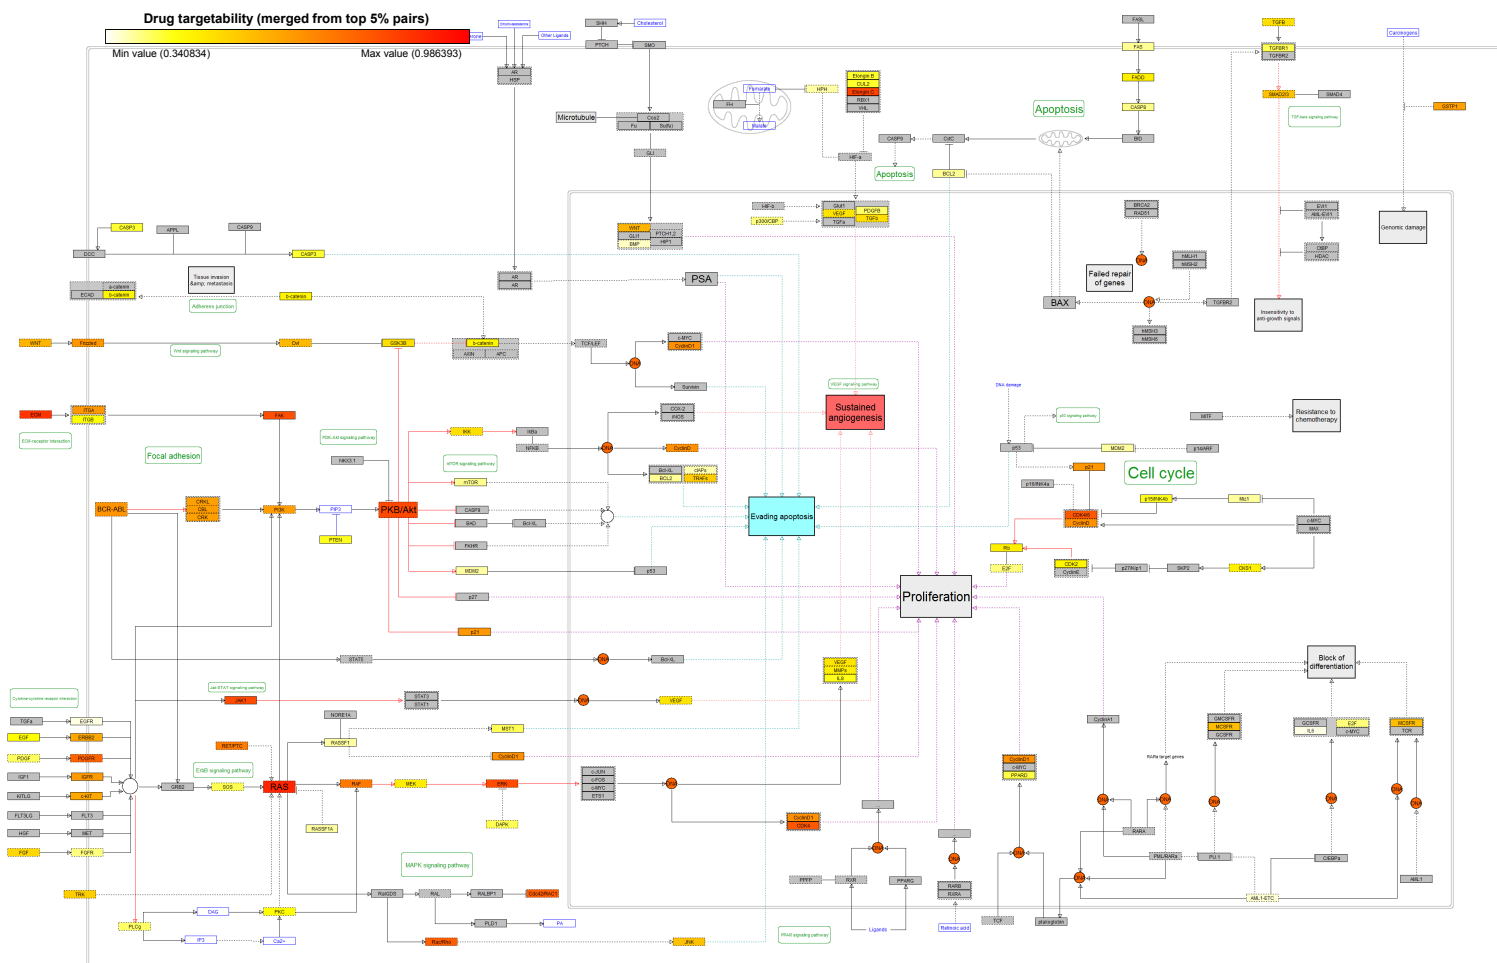

**Supplementary Fig. S2. Cancer pathway overlaid with drug targetability values.**

In the cancer pathway in the UnitPath database, node colors were overlaid with values of drug targetability. The color map shows the minimum (white) to maximum (red) drug targetability values.
